# A model for 2019-nCoV infection with treatment

Amar Nath Chatterjee<sup>1</sup> and Fahad Al Basir<sup>\*2</sup>

<sup>1</sup>Department of Mathematics, K.L.S. College, Nawada, Magadh University, Bodh Gaya, Bihar-805110, India

<sup>2</sup>Department of Mathematics, Asansol Girls' College, Asansol-4, West Bebgal-713304, India

July 6, 2020

## Abstract

The current emergence of coronavirus (2019-nCoV or **SARS-CoV-2**) puts the world in threat. The structural research on the receptor recognition by **SARS-CoV-2** has identified the key interactions between SARS-CoV-2 spike protein and its host (epithelium cell) receptor, also known as *angiotensin-converting enzyme 2 (ACE2)*. It controls both the cross-species and human-to-human transmissions of SARS-CoV-2. In view of this, we propose and analyze a mathematical model for investigating the effect of CTL responses over the viral mutation to control the viral infection when a post-infection **immunostimulant drug (Pidotimode)** is administered at regular intervals. Dynamics of the system with and without impulses have been analyzed using the basic reproduction number. This study shows that proper dosing interval and drug dose both are important to eradicate the viral infection.

**Keywords:** Mathematical model; Basic reproduction number; Stability analysis; Immunostimulant drug; Angiotensin Converting Enzyme 2 (ACE2); Impulsive differential equation.

## 1 Introduction

- <sup>1</sup> A novel coronavirus named 2019-nCoV or **SARS-CoV-2** (an interim name
- <sup>2</sup> **proposed by WHO (World Health Organization)** become pandemic since

---

\*Corresponding author. Email: fahadalbasir@yahoo.com

3 December 2019. The first infectious respiratory syndrome was recognised in  
4 Wuhan, Hubei province of China. Dedicated virologist identified and recog-  
5 nised the virus within a short time [3]. The SARS-CoV-2 is a single standard  
6 RNA virus genome which is closely related to severe acute respiratory syn-  
7 drome SARS-CoV [4]. The infection of SARS-CoV-2 is associated with a  
8 SARS-CoV like a disease with a fatality rate of 3.4% [5]. The World Health  
9 Organisation (WHO) have named the disease as COVID-19 and declared it  
10 as a public health emergency worldwide [2].

11 The common symptoms of COVID-19 are fever, fatigue, dry cough, myal-  
12 gia. Also, some patients suffer from headaches, abdominal pain, diarrhea,  
13 nausea, and vomiting. In the acute phase of infection, the disease may lead  
14 to respiratory failure which leads to death also. From clinical observation,  
15 within 1-2 days after patient symptoms, the patient becomes morbid after  
16 4-6 days and the infection may clear within 18 days [6] depending on the  
17 immune system. Thus appropriate quarantine measure for minimum two  
18 weeks is taken by the public health authorities for inhibiting community  
19 spread [1].

20 In [3], Zhou *et al.* identified that the respiratory tract as principal in-  
21 fection site for COVID-19 infection. SARS-CoV-2 infects primary human  
22 airway epithelial cells. Angiotensin converting enzyme II (ACE2) receptor  
23 of epithelial cells plays an important role in cellular entry [3,8]. It has been  
24 observed that ACE2 could be expressed in the oral cavity. ACE2 receptors  
25 are higher in tongue than buccal and gingival tissues. These findings imply  
26 that the mucosa of the oral cavity may be a potentially high-risk route of  
27 COVID-19 infection. Thus epithelial cells of the tongue are the major routes  
28 of entry for COVID-19. Zhou *et al.* [3] also reported that SARS-CoV-2 spikes  
29 S bind with ACE2 receptor of epithelial cells with high affinity. The bonding  
30 between S - spike of SARS-CoV-2 with ACE2 [8], results from the fusion  
31 between the viral envelope and the target cell membrane and the epithelial  
32 cells become infected. The S protein plays a major role in the induction of  
33 protective immunity during the infection of SARS-CoV-2 by eliciting neu-  
34 tralization antibody and T cell responses [10]. S protein is not only capable  
35 of neutralizing antibody but it also contains several immunogenic T cell epi-  
36 topes. Some of the epitopes found in either S1 or S2 domain. These proteins  
37 are useful for SARS-CoV-2 drug development [14].

38 We know that virus clearance after acute infection is associated with  
39 strong antibody responses. Antibody responses have the potential to control  
40 the infection [15]. Also, CTL responses help to resolve infection and virus  
41 persistence caused by weak CTL responses [9]. Antibody responses against  
42 SARS-CoV-2 play an important role in preventing the viral entry process

43 [10]. Hsueh et al. [4] found that antibodies block viral entry by binding to the  
44 S glycoprotein of SARS-CoV-2. To fight against the pathogen SARS-CoV-2,  
45 the body requires SARS-CoV-2 specific  $CD4^+T$  helper cells for developing  
46 this specific antibody [10]. Antibody-mediated immunity protection helps  
47 the anti-SARS-CoV serum to neutralize COVID-19 infection. Besides that,  
48 the role of T cell responses in COVID-19 infection is very much important.  
49 Cytotoxic T lymphocytes (CTLs) responses are important for recognizing  
50 and killing infected cells, particularly in the lungs [10]. But the kinetic of  
51 the CTL responses and antibody responses during SARS-CoV-2 infection is  
52 yet to be explored. Our study will focus on the role of CTL and its possible  
53 implication on treatment and drug development. the drug that stimulates  
54 the CTL responses represents the best hope for control of COVID-19. Here  
55 we have modeled the situation where CTLs can effectively control the viral  
56 infection when the post-infection drug is administered at regular intervals.

57 Mathematical modeling with real data can help in predicting the dynam-  
58 ics and control of an infectious disease [32,33]. A four-dimensional dynamical  
59 model for a viral infection is proposed by Tang et al. [11] for MERS-CoV  
60 mediated by DPP4 receptors. In case of SARS-CoV-2, the infection pro-  
61 cess is almost similar with MERS-CoV and SARS-CoV. For SARS-CoV-2  
62 infection, the ACE2 receptor of epithelium cell are the major target area.

63 Since the dynamics of the disease transmission of SARS-CoV-2 in cellular  
64 level is yet to be explored, thus we investigate the system in the light of  
65 previous literature of [11,26–29] to formulate the dynamic model which play  
66 a significant role in describing the interaction between uninfected cells, free  
67 virus and CTL responses. We propose a novel deterministic model which  
68 describes the cell biological infection of SARS-CoV-2 with epithelial cells  
69 and the role of the ACE2 receptor.

70 We explained the dynamics in the acute infection stage. It has been  
71 observed that CTL proliferate and differentiate antibody production after  
72 they encounter antigen. Here we investigate the effect of CTL responses  
73 over the viral mutation to control viral infection when a post-infection drug  
74 is administered at regular intervals by mathematical perspective.

75 It is clinically evident that immunostimulants play a crucial role in the  
76 case of respiratory disease. Among the currently available immunostimu-  
77 lants, Pidotimod is the most effective for the respiratory disease [31]. Pido-  
78 timod increases the level of immunoglobulins (IgA, IgM, IgG) and activates  
79 the CTL responses to fight against the disease.

80 In this article, we have considered the infection dynamics of SARS-CoV-  
81 2 infection in the acute stage. We have used impulsive differential equations  
82 to study the immunostimulant drug dynamics and the effects of perfect

83 drug adherence. In recent years the effects of perfect adherence have been  
84 studied by using impulsive differential equations in [12, 13, 17–21]. With  
85 the help of impulsive differential equations, the effect of maximal acceptable  
86 drug holidays and optimal dosage can be found more precisely [12, 21].

87 The article is organised as follows: The very next section contains the  
88 formulation of the impulsive mathematical model. Dynamics of the system  
89 without impulses has been provided in section 3. The system with impulses  
90 has been analysed in section 4. Numerical simulations, on the basis of the  
91 outcomes of section 3 and 4, have been included in section 5. Discussion in  
92 section 6 concludes the paper.

## 93 2 Model formulation

94 As discussed in the previous section, we propose a model considering the  
95 interaction between epithelium cells and SARS-CoV-2 virus along with lytic  
96 CTL responses over the infected cells. We consider five populations namely  
97 the uninfected epithelium cells  $T(t)$ , infected cells  $I(t)$ , ACE2 receptor of  
98 the epithelial cells  $E(t)$  and CTLs against the pathogen  $C(t)$ .

99 In this model, we consider which represents the concentration of ACE2  
100 on the surface of uninfected cells, which can be recognized by surface spike  
101 (S) protein of SARS-CoV-2 [24].

102 It is assumed that the susceptible cells are produced at a rate  $\lambda_1$  from the  
103 precursor cells and die at a rate  $d_T$ . The susceptible cells become infected a  
104 rate  $\beta E(t)V(t)T(t)$ . The constant  $d_I$  is the death rate of the infected cells.  
105 Infected cells are also cleared by the body's defensive CTLs at a rate  $p$ .

106 The infected cells produce new viruses at the rate  $md_I$  during their life,  
107 and  $d_V$  is the death rate of new virions, where  $m$  is any positive integer. It  
108 is also assumed that ACE2 is produced from the surface of uninfected cells  
109 at the constant rate  $\lambda_2$  and the ACE2 is destroyed, when free viruses try to  
110 infect uninfected cells, at the rate  $\theta\beta E(t)V(t)T(t)$  and is hydrolyzed at the  
111 rate  $d_E E$ .

112 CTL proliferation in the presence of infected cells is described by the  
113 term

$$\alpha IC \left( 1 - \frac{C}{C_{max}} \right),$$

114 which shows the antigen dependent proliferation. Here we consider the lo-  
115 gistic growth of CTL with  $C_{max}$  as the maximum concentration of CTL and  
116  $d_c$  is its rate of decay.

117 With the above assumptions, we have the following mathematical model  
 118 characterising the SARS-CoV-2 dynamics:

$$\begin{aligned}
 \frac{dT}{dt} &= \lambda_1 - \beta EVT - d_T T, \\
 \frac{dI}{dt} &= \beta EVT - d_I I - pIC, \\
 \frac{dV}{dt} &= md_I I - d_V V, \\
 \frac{dE}{dt} &= \lambda_2 - \theta \beta EVT - d_E E, \\
 \frac{dC}{dt} &= \alpha Y C \left( 1 - \frac{C}{C_{max}} \right) - d_c C.
 \end{aligned} \tag{1}$$

119 We now modify the above model incorporating pulse periodic drug dosing  
 120 using impulsive differential equation [22, 23].

121 We consider the perfect adherence behaviour of immunostimulant drug  
 122 for SARS-CoV-2 infected patients at fixed drug dosing times  $t_k$ ,  $k \in \mathbb{N}$ .

123 We assume that CTL cells increases by a fixed amount  $\omega$ , which is pro-  
 124 portional to the total number of CTLs that the drug can stimulate. Thus  
 125 the above model takes the following form:

$$\begin{aligned}
 \frac{dT}{dt} &= \lambda_1 - \beta EVT - d_T T, \\
 \frac{dI}{dt} &= \beta EVT - d_I I - pIC, \\
 \frac{dV}{dt} &= md_I I - d_V V, \\
 \frac{dE}{dt} &= \lambda_2 - \theta \beta EVT - d_E E, \\
 \frac{dC}{dt} &= \alpha Y C \left( 1 - \frac{C}{C_{max}} \right) - d_c C, & t \neq t_k, \\
 C(t_k^+) &= \omega + C(t_k^-), & t = t_k.
 \end{aligned} \tag{2}$$

126 Here,  $C(t_k^-)$  denotes the CTL cells concentration immediately before the  
 127 impulse,  $C(t_k^+)$  denotes the concentration after the impulse and  $\omega$  is the  
 128 fixed amount which is proportional to the total number of CTLs the drug  
 129 stimulates at each impulse time  $t_k$ ,  $k \in \mathbb{N}$ .

130 **Remark 1.** *It can be noted that when there is no drug application in the*  
 131 *system, model (2) becomes model (1).*

### 132 3 Analysis of the system without drug

133 In this section, we analyse the dynamics of the system without impulses i.e.  
 134 system (1). We have derived the *basic reproduction number* for the system.  
 135 Stability of equilibria are discussed using the number.

#### 136 3.1 Existence of equilibria

137 Model (2) has three steady states namely (i) the disease-free equilibrium  
 138  $E_1 \left( \frac{\lambda_1}{d_T}, 0, 0, \frac{\lambda_2}{d_E}, 0 \right)$ , (ii) with  $\bar{E} > \frac{d_T d_V}{\beta \lambda_1 m}$ , there is a CTL-responses-free equi-  
 139 librium,  $E_2(\bar{T}, \bar{I}, \bar{V}, \bar{E}, 0)$ , where,

$$\begin{aligned} \bar{T} &= \frac{d_V}{\beta m \bar{E}}, & \bar{I} &= \frac{\beta \lambda_1 n \bar{E} - d_T d_V}{\beta d_I m \bar{E}}, & \bar{V} &= \frac{\beta \lambda_1 m \bar{E} - d_T d_V}{\beta d_V \bar{E}}, \\ \bar{E} &= \frac{-(\theta \beta \lambda_1 m - \beta \lambda_2 m) + \sqrt{(\theta \beta \lambda_1 m - \beta \lambda_2 m)^2 + 4 \beta m d_T d_V d_E \theta}}{2 \beta d_E m}, \end{aligned}$$

140 and (iii) the endemic equilibrium  $E^*$  which is given by

$$\begin{aligned} T^* &= \frac{\lambda_1 \alpha - d_I \alpha I^* - p d_c}{d_T \alpha}, \\ V^* &= \frac{d_I m I^*}{d_V}, & E^* &= \frac{\lambda_2 \alpha - \theta \alpha d_I I^* - \theta p d_c}{d_E \alpha}, \\ C^* &= \frac{(\alpha I^* - d_c) C_{max}}{\alpha I^*}. \end{aligned}$$

141 where,  $I^*$  is the positive root of the cubic equation

$$L_0 I^3 + L_1 I^2 + L_2 I + L_3 = 0, \quad (3)$$

142 with,

$$\begin{aligned} L_0 &= -\alpha^2 \theta \beta d_I^3 m, \\ L_1 &= -2 \alpha \theta \beta d_I^2 d_c m p + \alpha^2 \theta \beta d_I^2 \lambda_1 m + \alpha^2 \beta d_I^2 \lambda_2 m, \\ L_2 &= \alpha^2 d_T d_I d_V d_E + \alpha \theta \beta d_I d_c \lambda_1 m p + \alpha \beta d_I d_c \lambda_2 m p \\ &\quad - \alpha^2 \beta d_I \lambda_1 \lambda_2 m - \theta \beta d_I d_c^2 m p^2, \\ L_3 &= \alpha d_T d_V d_E d_c p. \end{aligned}$$

143 **Remark 2.** Note that  $L_0 < 0$  and  $L_3 > 0$ . Thus, the equation (3) has at  
 144 least one positive real root. If  $L_1 > 0$  and  $L_2 < 0$ , then (3) can have two  
 145 positive roots. For a feasible endemic equilibrium we also need

$$\min \left\{ \frac{\lambda_1 \alpha - p d_c}{d_I \alpha}, \frac{\lambda_2 \alpha - \theta p d_c}{\theta \alpha d_I} \right\} > I^* > \frac{d_c}{\alpha}.$$

### 146 3.2 Stability of equilibria

147 In this section, the characteristic equation at any equilibria is determined  
 148 for the local stability of the system (2). Linearizing the system (2) at any  
 149 equilibria  $E(T, I, V, E, C)$  yields the characteristic equation

$$\Delta(\xi) = |\xi I_n - \mathbf{A}| = 0,$$

150 where  $I_n$  is the identity matrix and  $\mathbf{A} = [a_{ij}]$  is the following  $5 \times 5$  matrix  
 151 given by

$$\mathbf{A} = \begin{bmatrix} -\beta EV - d_T & 0 & -\beta ET & -\beta VT & 0 \\ \beta EV & -d_I - pC & \beta ET & \beta VT & -pI \\ 0 & d_I m & -d_v & 0 & 0 \\ -\theta \beta EV & 0 & -\theta \beta ET & -\theta \beta VT - d_E & 0 \\ 0 & \alpha C \left(1 - \frac{C}{C_{max}}\right) & 0 & 0 & a_{55} \end{bmatrix},$$

152 with  $a_{55} = \alpha I \left(1 - \frac{2C}{C_{max}}\right) - d_c$ . We finally get the characteristic equation as

$$\psi(\xi) = \xi^5 + A_1 \xi^4 + A_2 \xi^3 + A_3 \xi^2 + A_4 \xi + A_5 = 0. \quad (4)$$

153 The coefficients  $A_i$ ,  $i = 1, 2, \dots, 5$  are given in **Appendix-A**.

154 Looking at stability of any equilibrium  $E$ , the Routh-Hurwitz criterion  
 155 gives that all roots of this characteristic equation (4) have negative real  
 156 parts, provided the following conditions hold

$$\begin{aligned} A_5 > 0, \quad A_1 A_2 - A_3 > 0, \quad A_3(A_1 A_2 - A_3) - A_1(A_1 A_4 - A_5) > 0, \\ (A_1 A_2 - A_3)(A_3 A_4 - A_2 A_5) - (A_1 A_4 - A_5)^2 > 0. \end{aligned} \quad (5)$$

157 Let us define the *basic reproduction number* as

$$R_0 = \frac{m\beta\lambda_1\lambda_2}{d_T d_E d_V}, \quad (6)$$

158 then using (5) we can derived the following result:

159 **Theorem 1.** *Disease-free equilibrium  $E_1 \left(\frac{\lambda_1}{d_T}, 0, 0, \frac{\lambda_2}{d_E}, 0\right)$  of the model (2)*  
 160 *is stable for  $R_0 < 1$ , and unstable for  $R_0 > 1$ .*

161 At  $E_2$  one eigenvalue is  $-d_c$  and rest of the eigenvalues satisfy the fol-  
 162 lowing equation

$$\xi^4 + B_1\xi^3 + B_2\xi^2 + B_3\xi + B_4 = 0$$

163 The coefficients  $B_i$ ,  $i = 1, 2, \dots, 5$  are given in **Appendix-B**.

164 Using Routh-Hurwitz criterion, we have the following theorem.

165 **Theorem 2.** *CTL-free equilibrium,  $E_2(\bar{T}, \bar{I}, \bar{V}, \bar{E}, 0)$ , is asymptotically sta-*  
 166 *ble if and only if the following conditions are satisfied*

$$\begin{aligned} B_1 > 0, \quad B_2 > 0, \quad B_3 > 0, \quad B_4 > 0, \\ B_1B_2 - B_3 > 0, \quad (B_1B_2 - B_3)B_3 - B_1^2B_4 > 0. \end{aligned} \quad (7)$$

167 Denoting  $A_i^* = A_i(E^*)$  and using (5), we have the following theorem  
 168 establishing the stability of coexisting equilibrium  $E^*$ .

169 **Theorem 3.** *The coexisting equilibrium  $E^*$  is asymptotically stable if and*  
 170 *only if the following conditions are satisfied*

$$\begin{aligned} A_5^* > 0, \quad A_1^*A_2^* - A_3^* > 0, \quad A_3^*(A_1^*A_2^* - A_3^*) - A_1^*(A_1^*A_4^* - A_5^*) > 0, \\ (A_1^*A_2^* - A_3^*)(A_3^*A_4^* - A_2^*A_5^*) - (A_1^*A_4^* - A_5^*)^2 > 0. \end{aligned} \quad (8)$$

## 171 4 Dynamics of the system with impulsive drug 172 dosing

173 In this section we consider the model system (2). Before analysing the  
 174 system, we first discuss the one dimensional impulse system as follows:

$$\begin{aligned} \frac{dC}{dt} &= \alpha IC \left(1 - \frac{C}{C_{max}}\right) - d_c C, \quad t \neq t_k. \\ C(t_k^+) &= \omega + C(t_k^-), \quad t = t_k. \end{aligned} \quad (9)$$

175  $C(t_k^-)$  denotes the CTL responses immediately before the impulse drug dos-  
 176 ing,  $C(t_k^+)$  denotes the concentration after the impulse and  $\omega$  is the dose  
 177 that is taken at each impulse time  $t_k$ ,  $k \in \mathbb{N}$ .

178 We now consider the following linear system,

$$\begin{aligned} \frac{dC}{dt} &= -d_c C, \quad t \neq t_k \\ \Delta C &= \omega, \quad t = t_k \end{aligned} \quad (10)$$



179 where,  $\Delta = C(t_k^+) - C(t_k^-)$ . Let  $\tau = t_{k+1} - t_k$  be the period of the campaign.  
 180 The solution of the system (10) is,

$$C(t) = C(t_k^+)e^{-d_c(t-t_k)}, \quad \text{for } t_k < t \leq t_{k+1}. \quad (11)$$

181 In presence of impulsive dosing, we can get the recursion relation at the  
 182 moments of impulse as,

$$C(t_k^+) = C(t_k^-) + \omega.$$

Thus the amount of CTL before and after the impulse is obtained as,

$$C(t_k^+) = \frac{\omega(1 - e^{-k\tau d_c})}{1 - e^{-\tau d_c}}$$

and

$$C(t_{k+1}^-) = \frac{\omega(1 - e^{-k\tau d_c})e^{-\tau d_c}}{1 - e^{-\tau d_c}}.$$

183 Thus the limiting case of the CTL amount before and after one cycle is  
 184 as follows:

$$\lim_{k \rightarrow \infty} C(t_k^+) = \frac{\omega}{1 - e^{-\tau d_c}} \quad \text{and} \quad \lim_{k \rightarrow \infty} C(t_{k+1}^-) = \frac{\omega e^{-\tau d_c}}{1 - e^{-\tau d_c}}$$

185 and

$$C(t_{k+1}^+) = \frac{\omega e^{-\tau d_c}}{1 - e^{-\tau d_c}} + \omega = \frac{\omega}{1 - e^{-\tau d_c}}.$$

186 **Definition 1.** Let  $\Lambda \equiv (S_u, S_a, I, C)$ ,  $B_0 = [B : R_+^4 \rightarrow R_+]$ , then we say  
 187 that  $B$  belong to class  $B_0$  if the following conditions hold:

- 188 (i)  $B$  is continuous on  $(t_k, t_{k+1}] \times R_+^3$ ,  $n \in N$  and for all  $\Lambda \in R^4$ ,  
 189  $\lim_{(t, \mu) \rightarrow (t_k^+, \Lambda)} B(t, \mu) = B(t_k^+, \Lambda)$  exists,  
 190 (ii)  $B$  is locally Lipschitzian in  $\Lambda$ .

191 We now recall some results for our analysis from [22, 23].

192 **Lemma 1.** Let  $Z(t)$  be a solution of the system (9) with  $Z(0^+) \geq 0$ . Then  
 193  $Z_i(t) \geq 0$ ,  $i = 1, \dots, 4$  for all  $t \geq 0$ . Coreover,  $Z_i(t) > 0$ ,  $i = 1, \dots, 4$  for all  
 194  $t > 0$  if  $Z_i(0^+) > 0$ ,  $i = 1, \dots, 4$ .

195 **Lemma 2.** There exists a constant  $\gamma$  such that  $T(t) \leq \gamma$ ,  $I(t) \leq \gamma$ ,  $V(t) \leq \gamma$   
 196  $E(t) \leq \gamma$  and  $C(t) \leq \gamma$  for each and every solution  $Z(t)$  of system (9) for  
 197 all sufficiently large  $t$ .

198 **Lemma 3.** *Let  $B \in B_0$  and also consider that*

$$\begin{aligned} D^+B(t, Z) &\leq j(t, B(t, Z(t))), \quad t \neq t_k, \\ B(t, Z(t^+)) &\leq \Phi_n(B(t, Z(t))), \quad t = t_k, \end{aligned}$$

199 *where  $j : \mathbf{R}_+ \times \mathbf{R}_+ \rightarrow \mathbf{R}$  is continuous in  $(t_k, t_{k+1}]$  for  $e \in \mathbf{R}_+^2$ ,  $n \in N$ ,*  
 200 *the limit  $\lim_{(t,V) \rightarrow (t_k^+, x)} j(t, g) = j(t_k^+, x)$  exists and  $\Phi_n^i (i = 1, 2) : \mathbf{R}_+ \rightarrow \mathbf{R}_+$*   
 201 *is non-decreasing. Let  $y(t)$  be a maximal solution of the following impulsive*  
 202 *differential equation*

$$\begin{aligned} \frac{dx(t)}{dt} &= j(t, x(t)), \quad t \neq t_k, \\ x(t^+) &= \Phi_n(x(t)), \quad t = t_k, \quad x(0^+) = x_0, \end{aligned} \tag{12}$$

203 *existing on  $(0^+, \infty)$ . Then  $B(0^+, Z_0) \leq x_0$  implies that  $B(t, Z(t)) \leq y(t)$ ,  $t \geq$*   
 204 *0, for any solution  $Z(t)$  of system (9). If  $j$  satisfies additional smoothness*  
 205 *conditions to ensure the existence and uniqueness of solutions for (12), then*  
 206  *$y(t)$  is the unique solution of (12).*

207 We now consider the following sub-system:

$$\frac{dC(t)}{dt} = -d_c C, \quad t \neq t_k, \quad C(t_k^+) = C(t_k) + \omega, \quad C(0^+) = C_0. \tag{13}$$

208 The Lemma provided above, gives the following result,

**Lemma 4.** *System (13) has a unique positive periodic solution  $\tilde{C}(t)$  with period  $\tau$  and given by*

$$\tilde{C}(t) = \frac{\omega \exp(-d_c(t - t_k))}{1 - \exp(-\tau d_c)}, \quad t_k \leq t \leq t_{k+1}, \quad \tilde{C}(0^+) = \frac{d_c}{1 - \exp(-\tau d_c)}.$$

209 We use this result to derive the following theorem.

210 **Theorem 4.** *The disease-free periodic orbit  $(\tilde{T}, 0, 0, \tilde{E}, \tilde{C})$  of the system (2)*  
 211 *is locally asymptotically stable if*

$$\tilde{R}_0 < 1 \tag{14}$$

212 *where,*

$$\tilde{R}_0 = \frac{md_I\beta}{d_T d_E d_V \tau} \int_0^\tau \frac{\tilde{T}\tilde{E}}{d_I + p\tilde{C}} dt.$$

*Proof.* Let the solution of the system (9) without infected people be denoted by  $(\tilde{T}, 0, 0, \tilde{E}, \tilde{C})$ , where

$$\tilde{C}(t) = \frac{\omega \exp(-d_c(t - t_k))}{1 - \exp(-\tau d_c)}, \quad t_k \leq t \leq t_{k+1},$$

with initial condition  $C(0^+)$  as in Lemma 4. We now test the stability of the equilibria. The variational matrix at  $(\tilde{T}, 0, 0, \tilde{E}, \tilde{C})$  is given by

$$M(t) = [m_{ij}] = \begin{pmatrix} -d_T & 0 & m_{13} & 0 & 0 \\ 0 & -(d_I + p\tilde{C}) & \beta\tilde{E}\tilde{T} & 0 & 0 \\ 0 & md_I & -d_v & 0 & 0 \\ 0 & 0 & m_{43} & -d_E & 0 \\ 0 & m_{52} & 0 & 0 & -d_c \end{pmatrix}.$$

The monodromy matrix  $\mathbb{P}$  of the variational matrix  $M(t)$  is

$$\mathbb{P}(\tau) = I_n \exp\left(\int_0^\tau M(t)dt\right),$$

213 where  $I_n$  is the identity matrix. Note that  $m_{13}, m_{43}, m_{52}$  are not required  
214 for this analysis, therefore we have not mentioned their expressions.

215 We can write  $\mathbb{P}(\tau) = \text{diag}(\sigma_1, \sigma_2, \sigma_3, \sigma_4, \sigma_5)$ , where,  $\sigma_i$ ,  $i = 1, 2, 3, 4, 5$ ,  
216 are the Floquet multipliers and they are determined as

$$\begin{aligned} \sigma_1 &= \exp(-d_T\tau), \quad \sigma_{2,3} = \exp\left(\int_0^\tau \frac{1}{2} \left[-A \pm \sqrt{A^2 - 4B}\right] dt\right), \\ \sigma_4 &= \exp(-d_E\tau), \quad \sigma_5 = \exp(-d_c\tau). \end{aligned}$$

217 Here  $A = d_I + d_V + p\tilde{C}$  and  $B = d_V(d_I + p\tilde{C}) - md_I\beta\tilde{E}\tilde{T}$ . Clearly  $\lambda_{1,4,5} < 1$ .  
218 It is easy to check that  $A^2 - 4B > 0$  and if  $B \geq 0$  and hold then we  
219 have  $\lambda_{2,3} < 1$ . Thus, according to Floquet theory, the periodic solution  
220  $(\tilde{S}_u(t), 0, 0, \tilde{M}(t))$  of the system (9) is locally asymptotically stable if the  
221 conditions given in (14) hold.  $\square$

Table 1: Set of parameter values used of numerical simulations.

| Parameter   | Explanation                           | Assigned value |
|-------------|---------------------------------------|----------------|
| $\lambda_1$ | Production rate of uninfected cell    | 5              |
| $\lambda_2$ | Production rate of ACE2               | 1              |
| $\beta$     | Disease transmission rate             | 0.0001         |
| $\theta$    | Bonding rate of ACE2                  | 0.3            |
| $d_T$       | Death rate of uninfected cells        | 0.1            |
| $d_I$       | death rate of infected cells          | 0.1            |
| $d_V$       | Removal rate of virus                 | 0.1            |
| $d_E$       | Hydrolysing rate of epithelium cells  | 0.1            |
| $d_C$       | decay rate of CTL                     | 0.1            |
| $p$         | Killing rate of infected cells by CTL | 0.01           |
| $m$         | Number of new virions produced        | 10-100         |
| $\alpha$    | Proliferation rate of CTL             | 0.22           |
| $C_{max}$   | Maximum proliferation of CTL          | 100            |

## 222 5 Numerical results and discussion

223 In this section, we have observed the dynamical behaviours of system with-  
 224 out drug (Figure 1 and Figure 2) and with impulsive effect of the drug dose  
 225 (Figure 3 and Figure 4) through numerical simulations taking the paramete-  
 226 rs mainly from [11, 30, 31].

227 We have mainly focused on the role of CTL and its possible implication  
 228 on the treatment and drug development. The drug that stimulates the  
 229 CTL responses represents the best hope for control of COVID-19. Here we  
 230 have determined the situation where CTLs can effectively control the viral  
 231 infection when the post-infection drug is administered at regular intervals.

232 Existence of equilibria of the system without drug dose is shown for  
 233 different values of basic reproduction number  $R_0$ . In plotting the Figure 1,  
 234 we have varied the value of infection rate  $\beta$ . It is observed that for lower  
 235 infection rate (that corresponds to  $R_0 < 1$ ) disease free equilibrium  $E_1$  is  
 236 stable (corroborated with Theorem 1). It becomes unstable and ensure the  
 237 existence of CTL-free equilibrium  $E_2$  which is stable if  $R_0 < 2.957$  (which  
 238 corresponds to  $\beta = 0.00005963$ ) and unstable otherwise. (This satisfies  
 239 Theorem 2). Again we see that when  $E_2$  is unstable the  $E^*$  is feasible. Also  
 240 whenever  $E^*$  exists, it is stable which verified the Theorem 3.

241 Effect of immune response rate  $\alpha$  is plotted in Figure 2. We observe that  
 242 in the absence of Drug , the CTL count and ACE2 increases with increasing  
 243 value of  $\alpha$ . Steady state value of infected cell  $I^*$  and virus  $V^*$  decreases

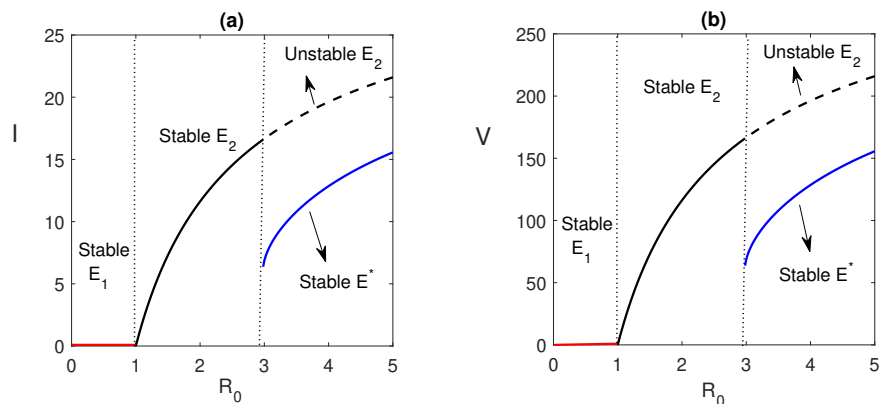

Figure 1: Existence and stability of equilibria is shown with respect to  $R_0$ . Parameters values used in this figure are taken from Table 1 and  $m = 10$ . We have varied the value of  $\beta$  in (0.00001, 0.0001).

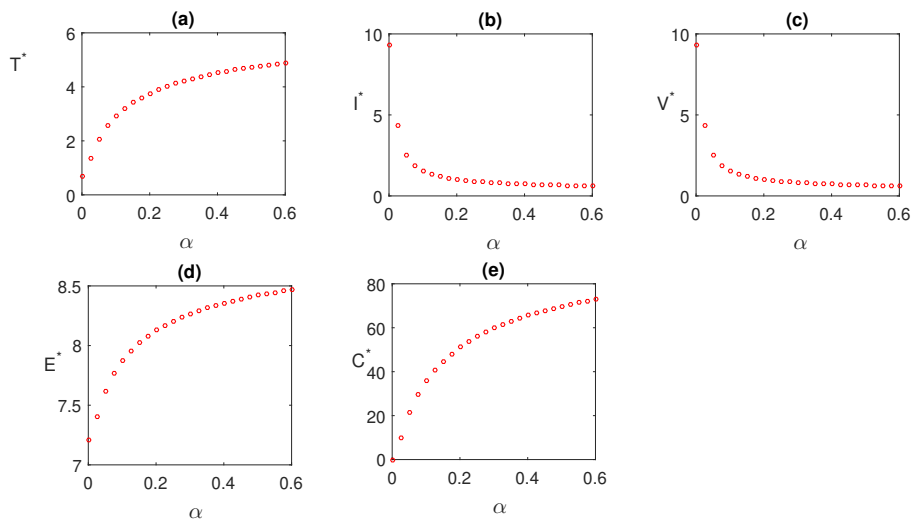

Figure 2: In the absence of the drug, effect of growth rate of CTL i.e.  $\alpha$  on the steady state values of model population is shown. Parameters values used in this figure are same as Figure 1 except  $\alpha$ .

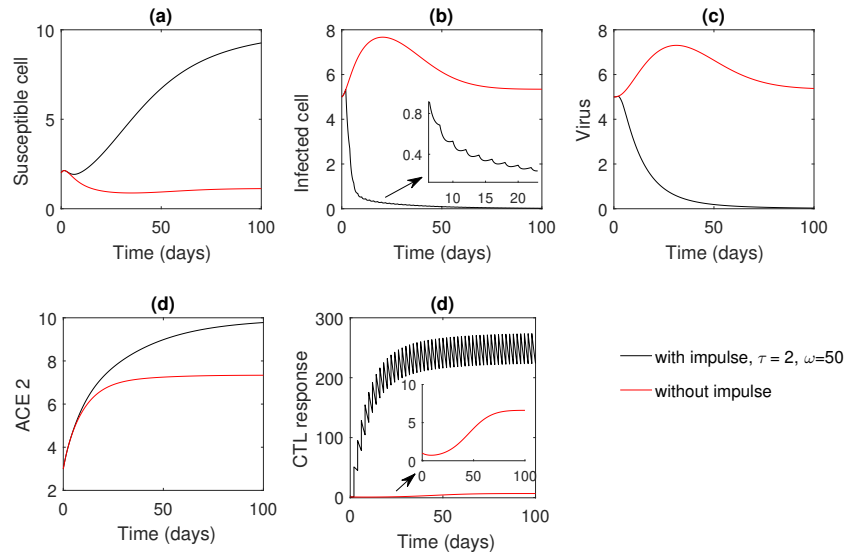

Figure 3: Numerical solution of the model system with and without drug dose is shown taking parameters as in Figure 1. In this figure,  $\tau = 2$ ,  $\omega = 50$ .

244 significantly as  $\alpha$  increases.

245 Due to the impulsive nature of the drugs, there are no equilibria of the  
 246 system i.e. population do not reach to towards equilibrium point, rather ap-  
 247 proach a periodic orbit. Hence, we evaluate equilibrium-like periodic orbits.  
 248 There are two periodic orbits of the system (2) namely the disease-free pe-  
 249 riodic orbit and endemic periodic orbit. Here our aim is to find the stability  
 250 of disease-free periodic orbit.

251 Figure 3 compare the system without and with impulse Drug effect. In  
 252 the absence of Drug we observe that the CTL count approaches a stable  
 253 equilibrium. Under regular drug dosing, the CTL count oscillates in an im-  
 254 pulsive periodic orbit. Assuming perfect adherence, if the drug is sufficiently  
 255 strong, both infected cell and virus population are approaches towards ex-  
 256 tinction. In this case, the total number of uninfected cells reach its maxi-  
 257 mum level which implies that the system approaches towards its infection  
 258 free state (Theorem 4).

259 If we take sufficiently large impulsive interval  $\tau = 5$  days (keeping rate  
 260  $\omega = 50$  fixed, as in Figure 3) or lower dosage effect  $\omega = 20$  (keeping interval  
 261  $\tau = 2$  fixed, as in Figure 3), in both the cases, infection is remains present

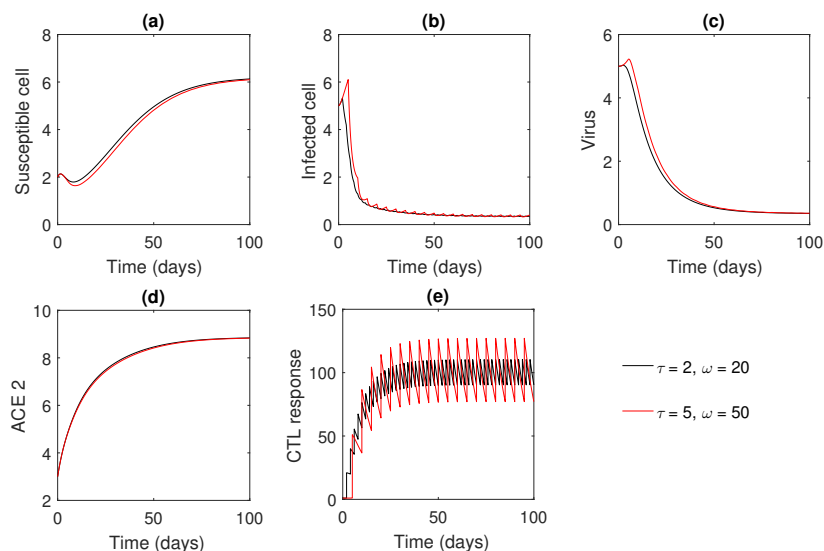

Figure 4: Numerical solution of the model system for different rates of Drug dosing and different intervals of impulses.

262 in the system. Thus proper dosage of drug and optimal dosing interval are  
 263 important for infection management.

## 264 6 Conclusion

265 In this article, the role of **immunostimulant drug (mainly Pidotimod)** during  
 266 interactions between SARS-CoV-2 spike protein and **epithelial cell** receptor  
 267 ACE2 in COVID-19 infection has been studied as a possible **drug dosing**  
 268 policy. To reactivate the CTL responses during the acute infection period,  
 269 **immune activator drugs** is delivered to the host system in an impulsive mode.

270 The **immunostimulant drug** when administered, the best possible CTL  
 271 responses can act against the infected or virus-producing cells to neutralize  
 272 infection. This particular situation can keep the infected cell population at  
 273 a very low level. In the proposed mathematical model, we have analyzed  
 274 the optimal dosing regimen for which infection can be controlled.

275 From this study, it has been observed that when the basic reproduction  
 276 ratio lies below one, we expect the system to attain its disease-free state.  
 277 However, the system switches from disease-free state to CTL-free equilib-  
 278 rium state when  $1 < R_0 < 2.957$ . If  $R_0 > 2.957$ , the CTL-free equilibrium

279 moves to an endemic state (Figure 1).

280 Here we have explored the immunostimulant drug dynamics by the help  
281 of impulsive differential equations. With the help of impulsive differential  
282 equations, we have studied how the effect of maximal acceptable optimal  
283 dosage can be found more precisely. Impulsive system shows that proper  
284 dosage and dosing intervals are important for the eradication of the infected  
285 cells and virus population which results the control of pandemic (Figure 3).

286 It has also been observed that the length of the dosing interval and the  
287 drug dose play a very decisive role to control and eradicate the infection.  
288 The most interesting prediction of this model is that effective therapy can  
289 often be achieved, even for low adherence, if the dosing regimen is adjusted  
290 appropriately (Figure 4). Also if the treatment regimen is not adjusted  
291 properly, the therapy is not effective at all. This approach might also be  
292 applicable to a combination of antiviral therapy.

293 Future extension work of the combination of drug therapy should also  
294 include more realistic patterns of non-adherence (random drug holidays, im-  
295 perfect timing of successive doses), more accurate intracellular pharmaco-  
296 kinetics and leads towards better estimates of drug dosage and drug dosing  
297 intervals.

298 We end the paper with the quotation: *“This outbreak is a test of political,*  
299 *financial and scientific solidarity for the world to fight a common enemy that*  
300 *does not respect borders..., what matters now is stopping the outbreak and*  
301 *saving lives.”* by Dr. Tedros, Director General, WHO [25].

#### 302 **Data Availability**

303 The data used for supporting the findings are included within the article.

#### 304 **Conflict of interest**

305 The authors declare that there is no conflict of interest.

#### 306 **Authors Contributions**

307 Both authors contributed equally to this work.



## 308 References

- 309 [1] World Health Organization, (2020). Considerations for quarantine  
310 of individuals in the context of containment for coronavirus disease  
311 (COVID-19): interim guidance, 29 February 2020.
- 312 [2] World Health Organization, 2020. WHO Director-General's opening  
313 remarks at the media briefing on COVID-19-11 March 2020. Geneva,  
314 Switzerland.
- 315 [3] Zhou, P. et al. (2020). A pneumonia outbreak associated with a new  
316 coronavirus of probable bat origin. *Nature*. Published online February  
317 3, 2020. [https://doi.org/ 10.1038/s41586-020-2012-7](https://doi.org/10.1038/s41586-020-2012-7).
- 318 [4] Hsueh PR, Huang LM, Chen PJ, Kao CL, Yang P.C. (2004). Chrono-  
319 logical evolution of IgM, IgA, IgG and neutralisation antibodies after  
320 infection with SARS-associated coronavirus. *Clin Microbiol Infect*, 10,  
321 1062-1066.
- 322 [5] Zhu, N. et al. (2020). A novel coronavirus from patients with pneumonia  
323 in China, *N. Engl. J. Med.* 382, 2019, 727-733.
- 324 [6] Zou, L. et al. (2020). SARS-CoV-2 viral load in upper respiratory spec-  
325 imens of infected patients. *N. Engl. J. Med.* Published online February  
326 19, 2020.
- 327 [7] Xu H., Zhong L., Deng J., Peng J., Dan H., Zeng X., Li T., Chen  
328 Q., (2020). High expression of ACE2 receptor of 2019-nCoV on the  
329 epithelial cells of oral mucosa, *International Journal of Oral Science*,  
330 12:8.
- 331 [8] Wan, Y., Shang, J., Graham, R., Baric, R.S. and Li, F., (2020). Re-  
332 ceptor recognition by the novel coronavirus from Wuhan: an analysis  
333 based on decade-long structural studies of SARS coronavirus. *Journal*  
334 *of virology*, 94(7).
- 335 [9] Zheng, M., Gao, Y., Wang, G., Song, G., Liu, S., Sun, D., Tian, Z.  
336 (2020). Functional exhaustion of antiviral lymphocytes in COVID-19  
337 patients. *Cellular & molecular immunology*, 17(5), 533-535.
- 338 [10] Hsueh-Ling Janice Oh, Samuel Ken-En Gan, Antonio Bertoletti, Yee-  
339 Joo Tan, Understanding the T cell immune response in SARS coro-  
340 navirus infection, *Emerging Microbes and Infections* (2012) 1, e23;  
341 [doi:10.1038/emi.2012.26](https://doi.org/10.1038/emi.2012.26).

- 342 [11] Tang S., Ma W., Bai P., (2017). A Novel Dynamic Model Describing the  
343 Spread of the MERS-CoV and the Expression of Dipeptidyl Peptidase  
344 4 Computational and Mathematical Methods in Medicine, Article ID  
345 5285810.
- 346 [12] Miron R.E., Smith R.J. (2010). Modelling imperfect adherence to HIV  
347 induction therapy. *BMC Infect Dis* 10: 6.
- 348 [13] Lou J, Smith R.J. Modelling the effects of adherence to the HIV fusion  
349 inhibitor enfuvirtide. *J Theor Biol* 2011; 268: 1–13.
- 350 [14] Li, G. and De Clercq, E., 2020. Therapeutic options for the 2019 novel  
351 coronavirus (2019-nCoV).
- 352 [15] Rothan, H.A. and Byrareddy, S.N., 2020. The epidemiology and patho-  
353 genesis of coronavirus disease (COVID-19) outbreak. *Journal of Au-  
354 toimmunity*, p.102433.
- 355 [16] Chen J, Hu C, Chen L, Tang L, Zhu Y, Xu X, Chen L, Gao H, Lu X,  
356 Yu L, Dai X. Clinical study of mesenchymal stem cell treating acute  
357 respiratory distress syndrome induced by epidemic Influenza A (H7N9)  
358 infection, a hint for COVID-19 treatment. *Engineering*. 2020 Feb 28.
- 359 [17] Smith RJ, Aggarwala BD. Can the viral reservoir of latently infected  
360 CD4(+) T cells be eradicated with antiretroviral HIV drugs? *J Math  
361 Biol* 2009; 59: 697–715.
- 362 [18] Smith R.J. (2008). Explicitly accounting for antiretroviral drug uptake  
363 in theoretical HIV models predicts long-term failure of protease-only  
364 therapy. *J Theor Biol* 251, 227-237.
- 365 [19] Smith R.J., Wahl LM. Drug resistance in an immunological model of  
366 HIV-1 infection with impulsive drug effects. *Bull Math Biol* 2005; 67:  
367 783–813.
- 368 [20] Lou J., Chen L., Ruggeri T. (2009). An Impulsive Differential Model on  
369 Post Exposure Prophylaxis to HIV-1 Exposed Individual. *J Biol Syst.*  
370 17, 659–683.
- 371 [21] Roy P. K., Chatterjee A. N., Li X. Z., (2016). The effect of vaccination  
372 to dendritic cell and immune cell interaction in HIV disease progression.  
373 *International Journal of Biomathematics*, 9 (1), p.1650005.

- 374 [22] Yu H., Zhong S., Agarwal R. P., (2011). Mathematics analysis and chaos  
375 in an ecological model with an impulsive control strategy, *Communica-*  
376 *tions in Nonlinear Science and Numerical Simulation*, 16(2), 776-786.
- 377 [23] Lakshmikantham V., Bainov D. D., Simeonov P. S., *Theory of Impulsive*  
378 *Differential Equations*, Series in Modern Applied Mathematics, World  
379 Scientific Publishing, 6, (1989).
- 380 [24] Qing E., Gallagher T. (2020). SARS Coronavirus Redux. *Trends in*  
381 *Immunology*. Mar 12, 2020.
- 382 [25] World Health Organization. Laboratory testing for coronavirus disease  
383 2019 (COVID-19) in suspected human cases: interim guidance, World  
384 Health Organization, 2 March, 2020.
- 385 [26] Nowak, M. A., May, R. M., (2000). *Virus Dynamics: Mathematics*  
386 *Principles of Immunology and Virology*, Oxford University Press, Lon-  
387 don, UK.
- 388 [27] Perelson, A. S., Nelson, P. W., (1999) *Mathematical analysis of HIV-1*  
389 *dynamics in vivo*, *SIAM Review*, vol. 41, no. 1, pp. 344.
- 390 [28] Chatterjee, A. N., Saha, S., Roy, P. K., (2015), *Human immunodeficiency*  
391 *virus/acquired immune deficiency syndrome: Using drug from*  
392 *mathematical perspective*, *World J Virol*, 4(4): 356-364.
- 393 [29] Roy, P. K., Chatterjee, A. N., Greenhalgh, D., Khan, Q. J.A., (2013),  
394 *Long Term Dynamics in a Mathematical Model of HIV-1 infection with*  
395 *delay in Different Variants of the basic drug the basic drug therapy*,  
396 *Nonlinear Analysis: Real World Applications*, 14, pp.1621–1633.
- 397 [30] Wu, C., Liu, Y., Yang, Y. et al. (2020). Analysis of therapeutic targets  
398 for SARS-CoV-2 and discovery of potential drugs by computational  
399 methods. *Acta Pharmaceutica Sinica B*.
- 400 [31] Puggioni, F., Alves-Correia, M., Mohamed, M. F. et al. (2019). Im-  
401 munostimulants in respiratory diseases: focus on Pidotimod. *Multidis-*  
402 *ciplinary Respiratory Medicine*, 14(1), 1–10.
- 403 [32] Qureshi, S., Yusuf, A. Fractional derivatives applied to MSEIR prob-  
404 lems: Comparative study with real world data. *Eur. Phys. J. Plus* 134,  
405 171 (2019). <https://doi.org/10.1140/epjp/i2019-12661-7>

406 [33] Sania Qureshi, Abdullahi Yusuf, Asif Ali Shaikh, Mustafa, Transmission  
 407 dynamics of varicella zoster virus modeled by classical and novel frac-  
 408 tional operators using real statistical data, Physica A 534 (2019) 122149  
 409

410 **Appendix-A**

$$\begin{aligned}
 A_1 &= -(a_{11} + a_{22} + a_{33} + a_{44} + a_{55}), \\
 A_2 &= a_{11}(a_{22} + a_{33}) + a_{23}a_{32} + a_{22}a_{33} - a_{14}a_{41} + (a_{11} + a_{22} + a_{33})a_{44} \\
 &\quad - a_{25}a_{52} + (a_{11} + a_{22} + a_{33} + a_{44})a_{55}, \\
 A_3 &= a_{32}(a_{11}a_{23} - a_{13}a_{21} - a_{24}a_{43}) - a_{11}a_{22}(a_{44} + a_{33}) + a_{14}a_{33}a_{41} \\
 &\quad + a_{44}(a_{23}a_{32} - a_{11}a_{33} - a_{22}a_{33}) + a_{25}a_{52}(a_{33} + a_{44} + a_{11}) \\
 &\quad - a_{11}a_{55}(a_{22} + a_{33}) + a_{23}a_{32}a_{55} - a_{22}a_{33}a_{55} \\
 &\quad - a_{44}a_{55}(a_{11} + a_{14}a_{41}a_{55} + a_{22} + a_{33}) + a_{14}a_{22}a_{41}, \\
 A_4 &= a_{32}a_{41}(a_{23}a_{14} - a_{13}a_{24}) - a_{22}a_{33}(a_{14}a_{41} - a_{44}a_{55}) \\
 &\quad - a_{14}a_{21}a_{32}a_{43} + a_{13}a_{21}a_{32}a_{44} - a_{11}(a_{23}a_{32}a_{44} + a_{25}a_{33}a_{52}) \\
 &\quad + a_{52}(a_{14}a_{25}a_{41} - a_{11}a_{25}a_{44} - a_{25}a_{33}a_{44}) + a_{13}a_{21}a_{32}a_{55} \\
 &\quad - a_{11}a_{55}(a_{23}a_{32} - a_{22}a_{33}) - a_{41}a_{55}(a_{14}a_{22} + a_{14}a_{33}) \\
 &\quad + a_{55}(a_{24}a_{32}a_{43} + a_{11}a_{22}a_{44} - a_{23}a_{32}a_{44}) \\
 &\quad + a_{11}a_{33}(a_{22}a_{44} + a_{44}a_{55}) + a_{11}a_{24}a_{32}a_{43}, \\
 A_5 &= a_{25}a_{33}(a_{11}a_{44}a_{52} - a_{14}a_{41}a_{52}) + (a_{14}a_{21}a_{32} - a_{11}a_{24}a_{32})a_{43}a_{55} \\
 &\quad + a_{41}a_{55}(a_{13}a_{24}a_{32} - a_{14}a_{23}a_{32} + a_{14}a_{22}a_{33}) + a_{44}a_{55}(a_{11}a_{23}a_{32} \\
 &\quad - a_{13}a_{21}a_{32} - a_{11}a_{22}a_{33}).
 \end{aligned}$$

411 **Appendix-B**

$$\begin{aligned}
 B_1 &= -(b_{11} + b_{22} + b_{33} + b_{44}), \\
 B_2 &= b_{11}b_{22} - b_{23}b_{32} + b_{33}(b_{11} + b_{22}) - b_{14}b_{41} \\
 &\quad + b_{44}(b_{11} + b_{22} + b_{33}) \\
 B_3 &= b_{32}(b_{11}b_{23} - b_{13}b_{21}) - b_{22}(b_{11}b_{33} - b_{14}b_{41}) \\
 &\quad + b_{14}b_{33}b_{41} - b_{24}b_{32}b_{43} \\
 &\quad + (b_{23}b_{32} - b_{11}b_{22})b_{44} - b_{33}b_{44}(b_{11} + b_{22}), \\
 B_4 &= b_{14}b_{41}(b_{23}b_{32} - b_{22}b_{33}) - b_{13}b_{24}b_{32}b_{41} \\
 &\quad - b_{14}b_{21}b_{32}b_{43} + b_{32}(b_{11}b_{24}b_{43} + b_{13}b_{21}b_{44}) \\
 &\quad - b_{44}b_{11}(b_{23}b_{32} - b_{22}b_{33}).
 \end{aligned}$$
